# Supplementary material
Source: bioRxiv or medRxiv preprint supplement (https://medrxiv.org/content/medrxiv/early/2023/03/01/2023.02.27.23286548.1/DC1/embed/media-1.pdf)
Supplement: Supplementary file [file media-1.pdf]

# Supplemental Figure 1

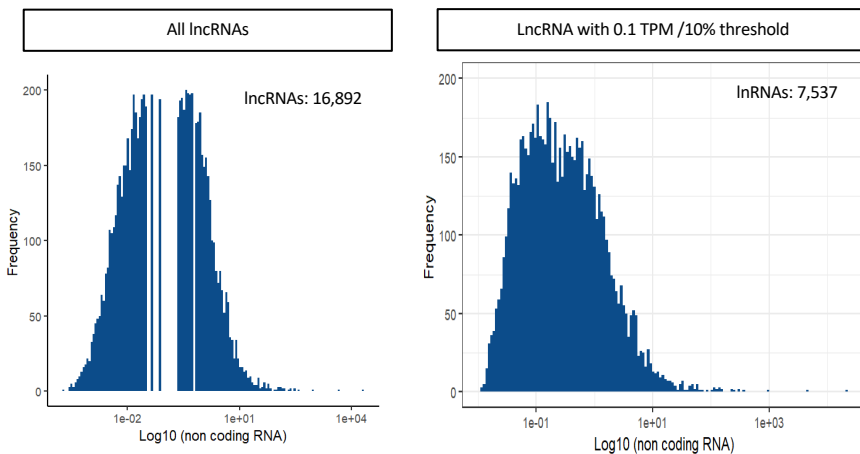

| Filter                               | Genes  | Percentage |
|--------------------------------------|--------|------------|
| Total RNAs                           | 60,754 | 100%       |
| Total number of non-coding RNAs      | 16,892 | 26.8%      |
| $\geq 0.1$ TPM $\geq 10\%$ threshold | 7,537  | 12.4%      |

**Supplemental Figure 1: lncRNA distribution in sequenced neurons.** Left panel, distribution of lncRNA expression (including all lncRNAs). Right panel, after applying thresholds of 0.1 TPM expression in 10% of samples, histogram captures normal distribution. Table summarizing the numbers of genes at each stage. \*TPM: transcripts per kilobase Million. Normalized for gene length and for sequence depth

## Supplemental Figure 2

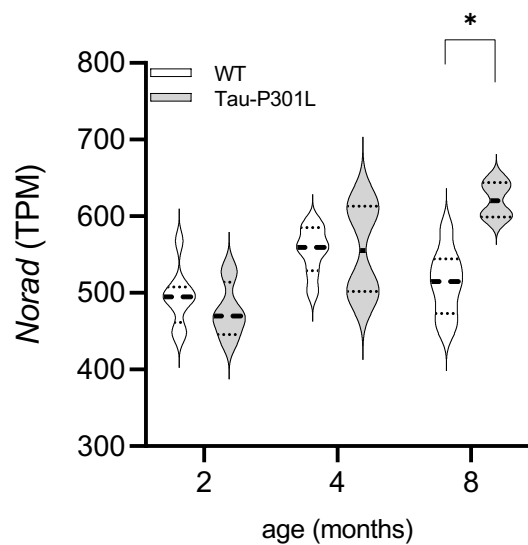

**Supplemental Figure 2: *Norad* is differentially expressed in *MAPT* p.P301L mice.**  
Normalized read counts (TPM) of *Norad* in WT mice and Tau-P301L mice. \*,  $p < 0.05$ .

## Supplemental Figure 3

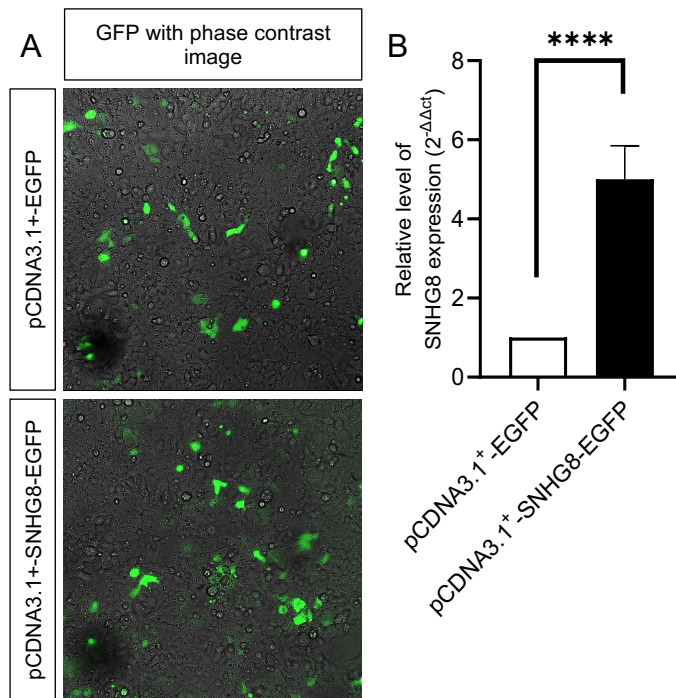

**Supplemental Figure 3: Ectopic expression of *lncRNA-SNHG8* in HEK293T cells.** A. Representative fluorescence images of HEK293T cells transfected with pCDNA3.1+-EGFP and pCDNA3.1+-SNHG8-EGFP plasmid constructs and images were taken 48hrs post transfection. The fluorescence images were overlaid with specific phase contrast image. B. Relative expression of *SNHG8* in HEK293T cells transfected with pCDNA3.1+-EGFP or pCDNA3.1+-SNHG8-EGFP plasmids. Expression normalized to GAPDH. n=4. Data are represented as mean  $\pm$  SEM. \*\*\*\* p < 0.0001; unpaired Student's t-test.
